# Supplementary material
Source: MDPI journal article supplement (https://www.mdpi.com/2079-9284/11/2/44)
Supplement: s1 [file s1]

# Topical Peroxisome Proliferator-Activated Receptor Agonist Induces Molecular Alterations Enhancing Barrier Function and Water-Holding Capacity of the Human Stratum Corneum In Vivo

Maxim E. Darwin <sup>1\*</sup>, Andrew Salazar <sup>2</sup>, Johannes Schleusener <sup>1</sup>, Jürgen Lademann <sup>1</sup> and Jörg von Hagen <sup>2,3\*</sup>

<sup>1</sup> Charité – Universitätsmedizin Berlin, corporate member of Freie Universität Berlin and Humboldt-Universität zu Berlin, Department of Dermatology, Venerology and Allergology, Center of Experimental and Applied Cutaneous Physiology, Charitéplatz 1, 10117 Berlin, Germany;

<sup>2</sup> Merck KGaA, Frankfurter Straße 250, 64293 Darmstadt, Germany;

<sup>3</sup> ryon - GreenTech Accelerator Gernsheim GmbH, Mainzer Str.41, 64579 Gernsheim, Germany

\* Correspondence: [joerg.von.hagen@merckgroup.com](mailto:joerg.von.hagen@merckgroup.com); [maxim.darvin@protonmail.com](mailto:maxim.darvin@protonmail.com)

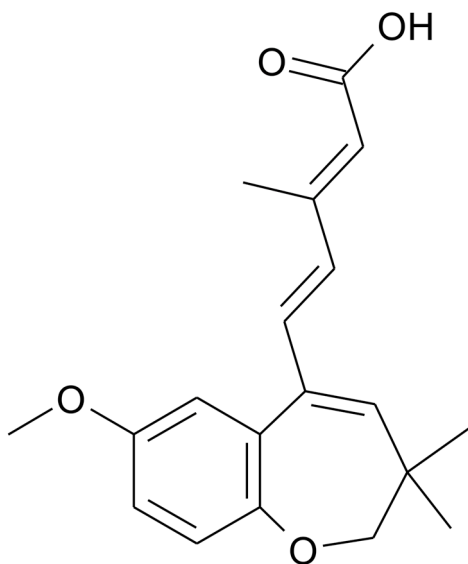

**Figure S1.** Chemical structure of oxeglitazar.

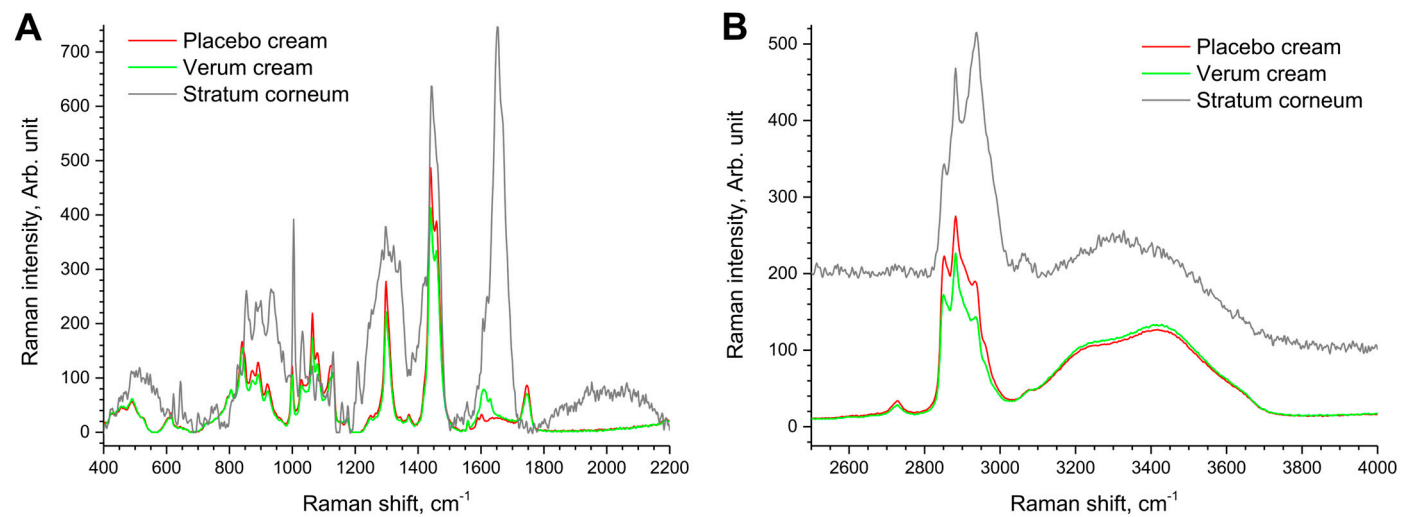

**Figure S2.** Baseline removed Raman spectra of untreated skin (SC, depth  $\approx 7 \mu\text{m}$ ) (black), placebo cream (red) and verum cream (green) in the FP (**A**) and HWN (**B**) ranges.

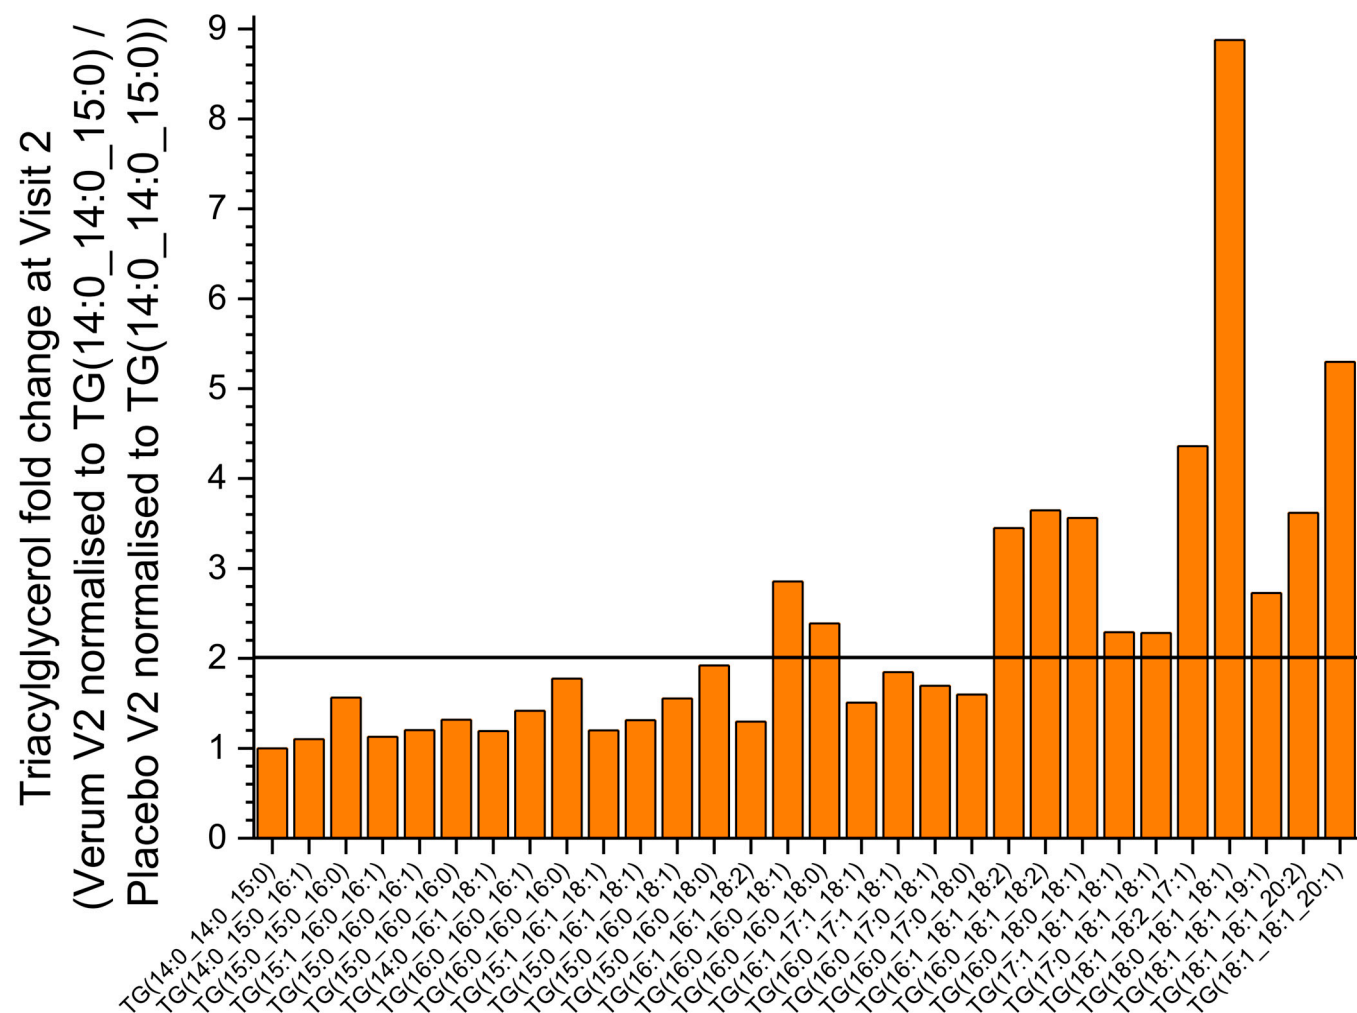

**Figure S3.** Triacylglycerol fold change during visit 2 (verum V2 normalised / placebo V2 normalised ratio) normalised to the concentration of short-length chain TG(14:0\_14:0\_15:0). The horizontal line indicates a 2-fold change between the verum and placebo groups.

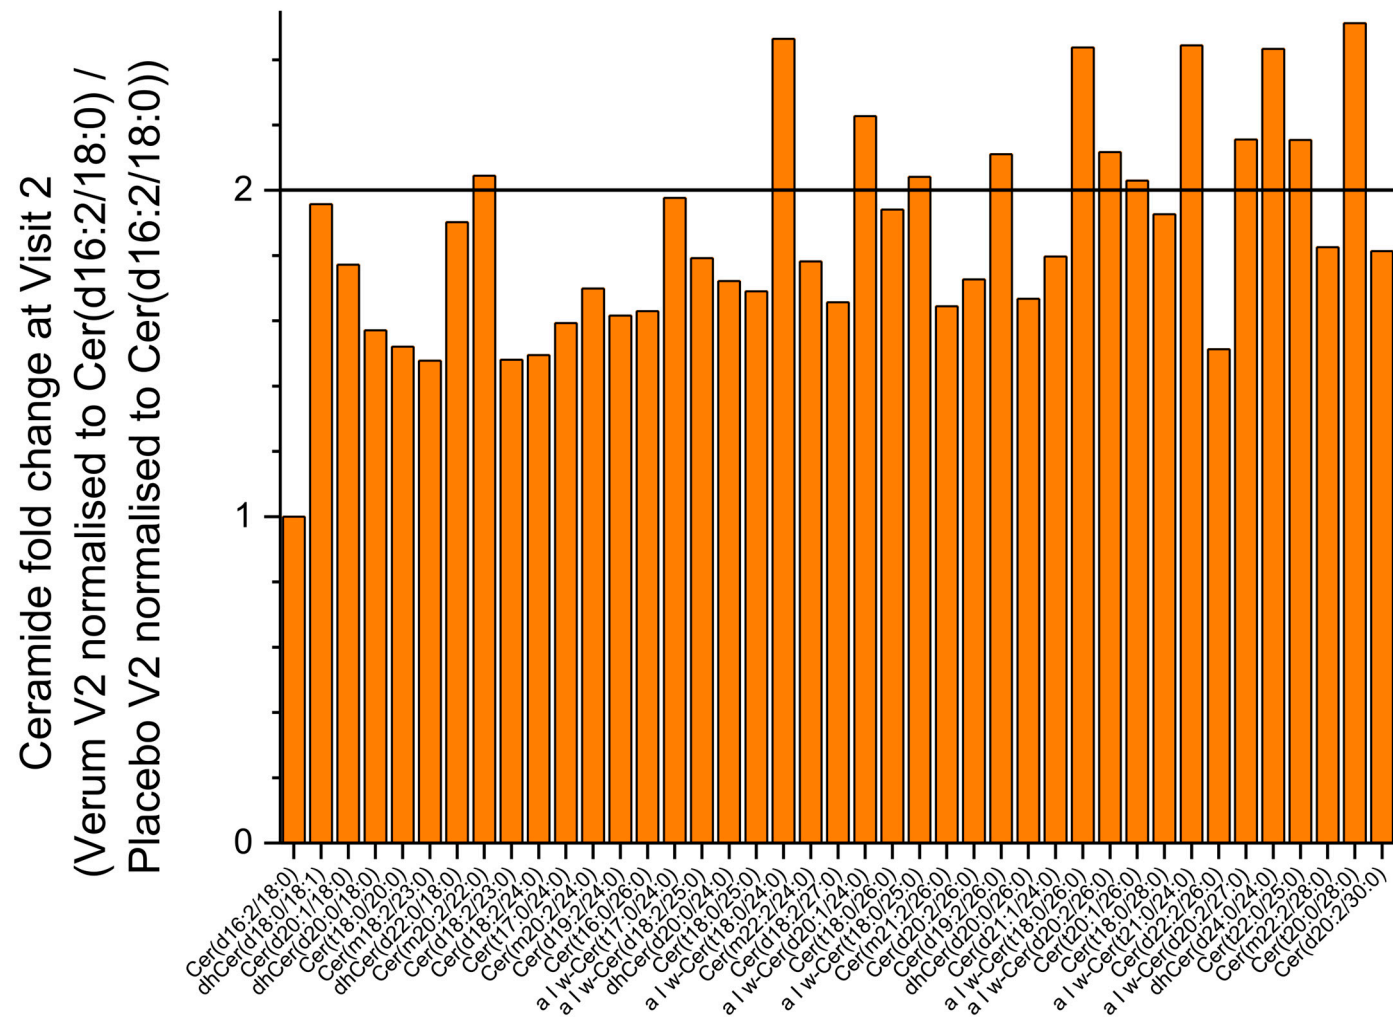

**Figure S4.** Ceramide fold change during visit 2 (verum V2 normalised / placebo V2 normalised ratio) normalised to the concentration of short-length chain Cer(d16:2/18:0). The horizontal line indicates a 2-fold change between the verum and placebo groups.
